# Supplementary material
Source: Springer Nature journal article supplement (https://www.springermedizin.de/resource/supplementary/13017_2014_364_MOESM1_ESM.pdf/9636038)

# ROC Curve

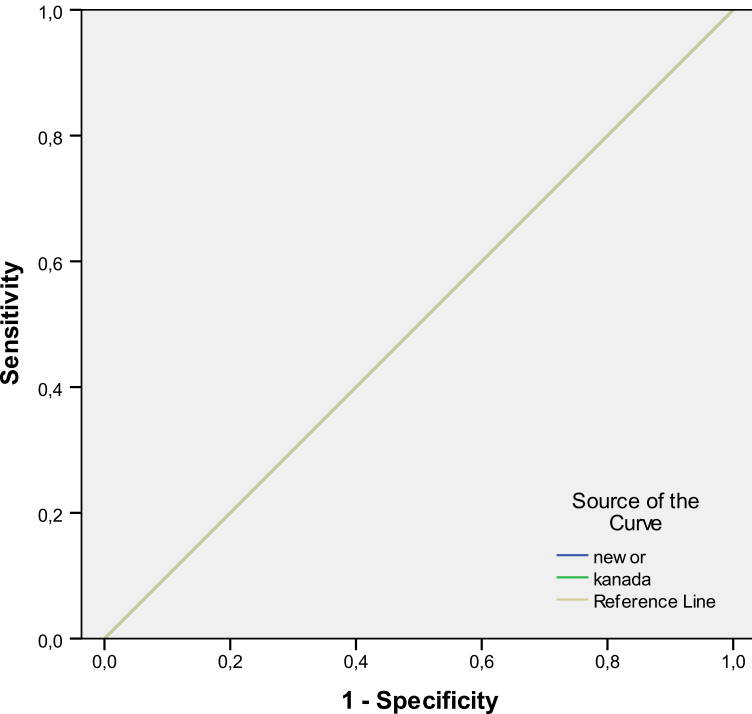

Supplement: MOESM1 [file 9636038]
